# Supplementary material for: Integrating TiO2/SiO2 into Electrospun Carbon Nanofibers towards Superior Lithium Storage Performance
Source: MDPI journal article supplement (doi:10.3390/nano9010068), 2019-01-05
Supplement: s1 [file s1]

## Supporting Information

# Integrating TiO<sub>2</sub>/SiO<sub>2</sub> into Electrospun Carbon Nanofibers towards Superior Lithium Storage Performance

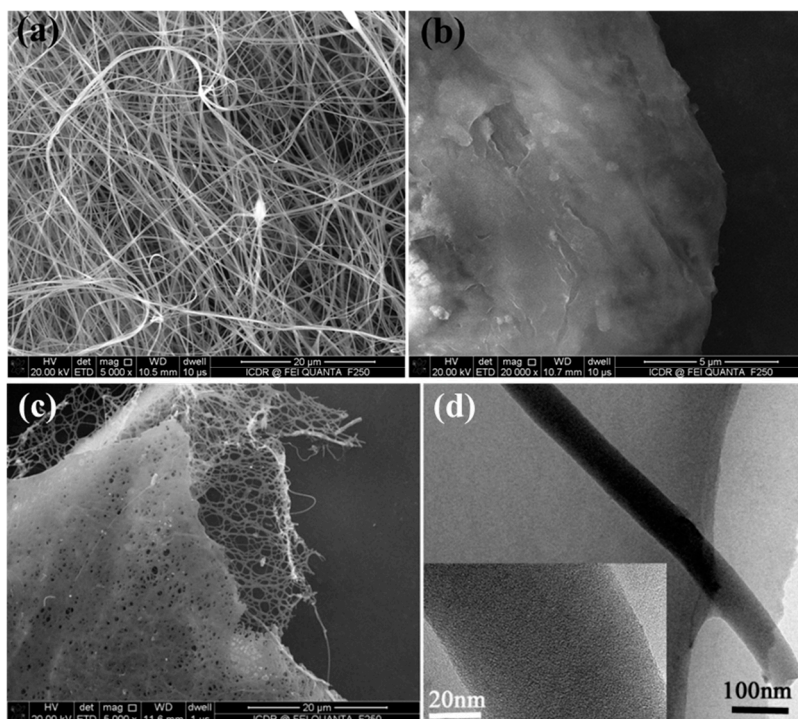

**Figure 1.** SEM images of (a) the TBT/PVP nanofibers (without TEOS) and the counterpart after annealing. (c) SEM and (d and inset) TEM images of the annealed TEOS-PVP fibers under the same condition. These results reveal that the TEOS derived silica and TBT-derived titania can simultaneously facilitate to maintain the fibrous morphology.

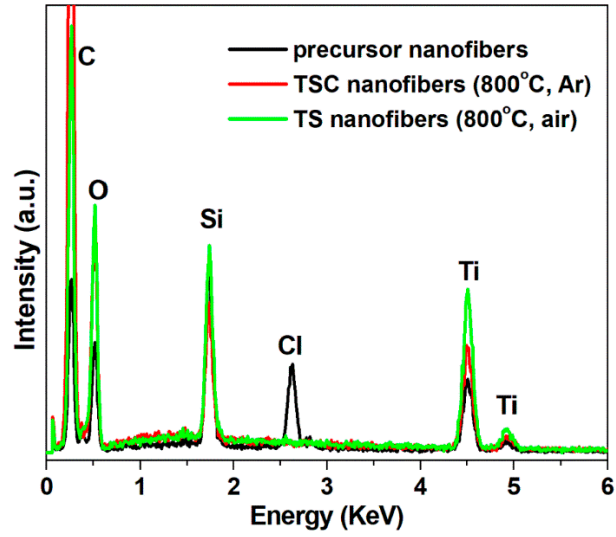

**Figure S2.** EDS spectra of the TEOS/TBT/PVP precursor nanofibers, TSC and TS (obtained after TGA analysis) nanofibers, which revealed the Ti/Si atomic ratio was almost constant at  $\sim 1.3$ .

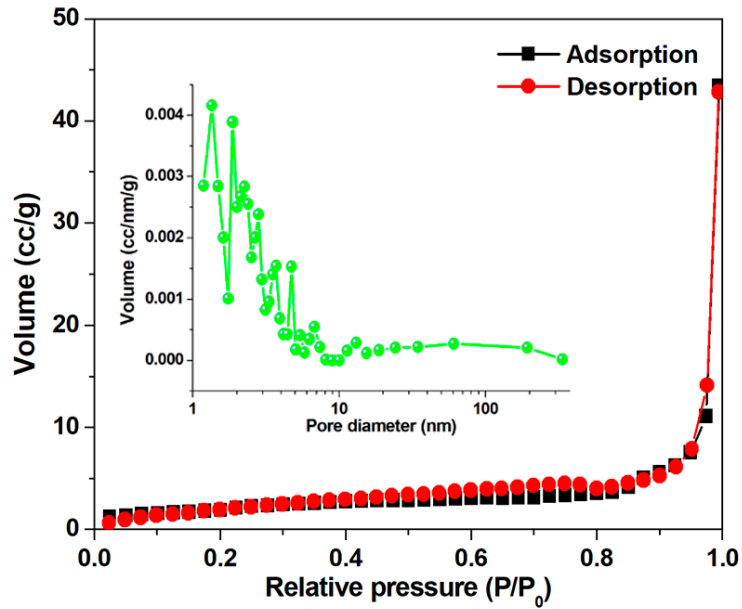

**Figure S3.**  $N_2$  adsorption-desorption isotherms of the TSC nanofibers, with inset showing the corresponding pore size distribution.

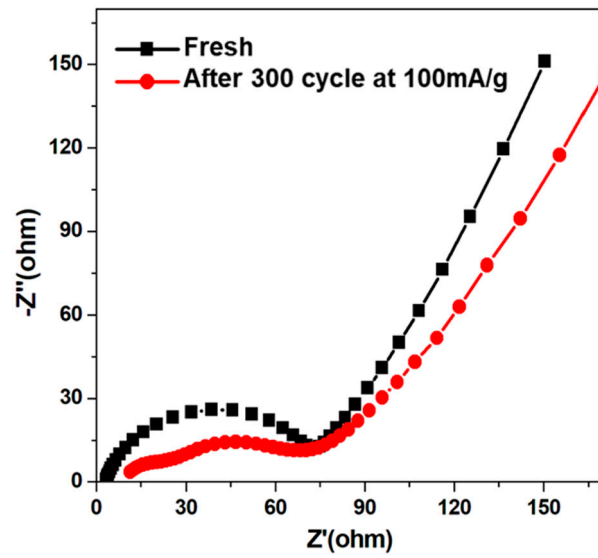

**Figure S4.** Nyquist plots of the fresh TSC electrode at OPV of 2.85V and its counterpart after cycling at 1000 mA/g at OPV of 2.62 V (OPV: open circuit voltage).
